# Supplementary material for: Pancreatic cancer is associated with medication changes prior to clinical diagnosis
Source: Springer Nature journal article supplement (doi:10.1038/s41467-023-38088-2), 2023-04-28
Supplement: MOESM1 [file 41467_2023_38088_MOESM1_ESM.pdf]

## SUPPLEMENTARY INFORMATION

### **Pancreatic cancer is associated with medication changes prior to clinical diagnosis**

Yin Zhang, Qiao-Li Wang, Chen Yuan, Alice A. Lee, Ana Babic, Kimmie Ng, Kimberly Perez, Jonathan A. Nowak, Jesper Lagergren, Meir J. Stampfer, Edward L. Giovannucci, Chris Sander, Michael H. Rosenthal, Peter Kraft, Brian M. Wolpin

**Supplementary Table 1.** Summary of study populations by medication use category

**Supplementary Table 2.** Characteristics of participants according to antidiabetic, anticoagulant, and antihypertensive medication use in the pooled NHS and HPFS cohorts

**Supplementary Table 3.** Characteristics of participants according to antacid, NSAIDs, and antidepressant medication use in the pooled NHS and HPFS cohorts

**Supplementary Table 4.** Recent change in antidiabetic, anticoagulant, and antihypertensive medication use and 2-year risk of pancreatic cancer diagnosis in the pooled NHS and HPFS cohorts

**Supplementary Table 5.** Recent change in antacid, NSAIDs, and antidepressant medication use and 2-year risk of pancreatic cancer diagnosis in the pooled NHS and HPFS cohorts

**Supplementary Table 6.** Sensitivity analysis of recent change in antidiabetic, anticoagulant, and antihypertensive medication use and 2-year risk of pancreatic cancer diagnosis in the pooled NHS and HPFS cohorts with four-category medication change exposure variable

**Supplementary Table 7.** Sensitivity analysis of recent change in antacid, NSAIDs, and antidepressant medication use and 2-year risk of pancreatic cancer diagnosis in the pooled NHS and HPFS cohorts with four-category medication change exposure variable

**Supplementary Table 8.** Recent change in antidiabetic, anticoagulant, and antihypertensive medication use and 2-year risk of pancreatic cancer diagnosis in the NHS cohort

**Supplementary Table 9.** Recent change in antacid, NSAIDs, and antidepressant medication use and 2-year risk of pancreatic cancer diagnosis in the NHS cohort

**Supplementary Table 10.** Recent change in anticoagulant and antihypertensive medication use and 2-year risk of pancreatic cancer diagnosis in the HPFS cohort

**Supplementary Table 11.** Recent change in antacid, NSAIDs, and antidepressant medication use and 2-year risk of pancreatic cancer diagnosis in the HPFS cohort

**Supplementary Table 12.** Combined associations of recent changes in medication use with 2-year risk of pancreatic cancer diagnosis in the NHS cohort

**Supplementary Table 13.** Recent change in medication use and 2-year risk of other digestive system cancer diagnosis in the pooled NHS and HPFS cohorts

**Supplementary Table 1. Summary of study populations by medication use category**

| Medication under study                                                 | Timelines of exposure assessments                 | Timelines of analyses <sup>a</sup>                | Eligible participants | Person-years of follow-up | Incident pancreatic cancer cases |
|------------------------------------------------------------------------|---------------------------------------------------|---------------------------------------------------|-----------------------|---------------------------|----------------------------------|
| Antidiabetic medications                                               | NHS: 1988-2010<br>HPFS: Not included <sup>b</sup> | NHS: 1990-2012<br>HPFS: Not included <sup>b</sup> | 101,294               | 2,015,712                 | 588                              |
| Anticoagulant medications                                              | NHS: 1994-2010<br>HPFS: 1996-2010                 | NHS: 1996-2012<br>HPFS: 1998-2012                 | 128,718               | 1,791,733                 | 688                              |
| Antihypertensive medications                                           | NHS: 1988-2010<br>HPFS: 1986-2010                 | NHS: 1990-2012<br>HPFS: 1988-2012                 | 148,973               | 2,994,057                 | 991                              |
| Antacids                                                               | NHS: 2000-2010<br>HPFS: 2004-2010                 | NHS: 2002-2012<br>HPFS: 2006-2012                 | 83,611                | 648,333                   | 269                              |
| NSAIDs                                                                 | NHS: 1990-2010<br>HPFS: 1986-2010                 | NHS: 1992-2012<br>HPFS: 1988-2012                 | 145,883               | 2,611,575                 | 903                              |
| Antidepressants                                                        | NHS: 1996-2010<br>HPFS: 1990-2010                 | NHS: 1998-2012<br>HPFS: 1992-2012                 | 131,787               | 1,880,573                 | 755                              |
| Combined antidiabetic, anticoagulant, and antihypertensive medications | NHS: 1994-2010<br>HPFS: Not included <sup>b</sup> | NHS: 1996-2012<br>HPFS: Not included <sup>b</sup> | 84,623                | 1,128,153                 | 376                              |

Abbreviations: NHS, Nurses' Health Study; HPFS, Health Professionals Follow-up Study; NSAIDs, non-steroidal anti-inflammatory drugs.

<sup>a</sup> Medication change in the prediagnosis time window was measured by comparing questionnaires returned at a median of 1 year (current status of medication use) and 3 years (previous status of medication use) before diagnosis. Therefore, 2-year intervals were present between baseline of analyses and the time when information on use of medications was first assessed.

<sup>b</sup> Information on antidiabetic medication use in HPFS was assessed in 2008 and afterwards. Given the short interval with available data, antidiabetic medication use in HPFS was not included in the analyses of change in antidiabetic medication use and the combined associations of starting antidiabetic, starting anticoagulant, and stopping antihypertensive medications.

**Supplementary Table 2. Characteristics of participants according to antidiabetic, anticoagulant, and antihypertensive medication use in the NHS and HPFS cohorts**

| Characteristic <sup>a,b,c,d</sup>                         | OHG<br>(NHS) |             | Insulin<br>(NHS) |             | Anticoagulant<br>(Pooled NHS and HPFS) |             | Antihypertensive medication<br>(Pooled NHS and HPFS) |             |
|-----------------------------------------------------------|--------------|-------------|------------------|-------------|----------------------------------------|-------------|------------------------------------------------------|-------------|
|                                                           | No           | Yes         | No               | Yes         | No                                     | Yes         | No                                                   | Yes         |
| Age, years, mean (SD)                                     | 65.7 (9.3)   | 69.8 (7.7)  | 65.8 (9.3)       | 68.8 (8.2)  | 68.7 (8.5)                             | 74.9 (7.5)  | 64.3 (10.0)                                          | 68.8 (8.6)  |
| Caucasian, %                                              | 97.0         | 95.8        | 97.0             | 95.8        | 95.4                                   | 96.0        | 94.6                                                 | 95.4        |
| BMI, kg/m <sup>2</sup> , mean (SD) <sup>e</sup>           | 25.3 (4.4)   | 30.7 (5.4)  | 25.4 (4.4)       | 29.6 (6.0)  | 25.7 (4.2)                             | 27.3 (5.2)  | 25.2 (3.9)                                           | 26.6 (4.6)  |
| Pack-years of smoking, mean (SD) <sup>f</sup>             | 13.4 (20.0)  | 13.9 (20.5) | 13.4 (20.0)      | 14.1 (20.7) | 12.7 (19.4)                            | 13.8 (19.7) | 12.7 (19.4)                                          | 13.3 (19.5) |
| History of diabetes mellitus, %                           | 6.6          | 97.8        | 8.5              | 99.3        | 11.0                                   | 18.3        | 7.4                                                  | 13.7        |
| Physical activity, MET-hours/week, mean (SD) <sup>g</sup> | 16.9 (16.9)  | 13.0 (12.9) | 16.8 (16.9)      | 13.1 (14.4) | 20.9 (19.6)                            | 19.3 (18.0) | 21.5 (21.1)                                          | 18.8 (17.8) |
| Alcohol, g/day, mean (SD)                                 | 5.6 (8.5)    | 2.8 (5.9)   | 5.5 (8.5)        | 2.6 (6.0)   | 6.8 (10.0)                             | 7.3 (10.8)  | 7.2 (10.7)                                           | 7.3 (11.0)  |
| Multivitamin use, %                                       | 49.8         | 56.2        | 50.0             | 54.6        | 56.4                                   | 60.0        | 44.5                                                 | 58.7        |

Abbreviations: NHS, Nurses' Health Study; HPFS, Health Professionals Follow-up Study; SD, standard deviation; BMI, body mass index; MET, metabolic equivalent task; OHG, oral hypoglycemic agent.

<sup>a</sup> Follow-up time: antidiabetic medications (NHS: 1990-2012; information on antidiabetic medication use in HPFS was assessed relatively late (in 2008 and afterwards) and was therefore not included in the analyses), anticoagulant (NHS: 1996-2012; HPFS: 1998-2012), and antihypertensive medications (NHS: 1990-2012; HPFS: 1988-2012).

<sup>b</sup> All variables are age-standardized except age.

<sup>c</sup> Percentages are of non-missing values.

<sup>d</sup> Percentages may not sum to 100% after rounding.

<sup>e</sup> Calculated as weight in kilograms divided by height in meters squared.

<sup>f</sup> Cumulative among ever smokers.

<sup>g</sup> Weekly energy expenditure in MET-hours/week from recreational and leisure-time physical activity.

**Supplementary Table 3. Characteristics of participants according to antacid, NSAIDs, and antidepressant medication use in the NHS and HPFS cohorts**

| Characteristic <sup>a,b,c,d</sup>                         | H2 blocker<br>(Pooled NHS and HPFS) |             | Proton pump inhibitor<br>(Pooled NHS and HPFS) |             | NSAIDs<br>(Pooled NHS and HPFS) |             | Antidepressant<br>(Pooled NHS and HPFS) |             |
|-----------------------------------------------------------|-------------------------------------|-------------|------------------------------------------------|-------------|---------------------------------|-------------|-----------------------------------------|-------------|
|                                                           | No                                  | Yes         | No                                             | Yes         | No                              | Yes         | No                                      | Yes         |
| Age, years, mean (SD)                                     | 71.6 (7.5)                          | 71.6 (7.3)  | 71.6 (7.5)                                     | 71.9 (7.3)  | 65.1 (9.9)                      | 67.1 (9.3)  | 68.6 (9.1)                              | 68.4 (8.2)  |
| Caucasian, %                                              | 96.6                                | 97.5        | 96.6                                           | 97.4        | 94.5                            | 95.7        | 94.3                                    | 97.3        |
| BMI, kg/m <sup>2</sup> , mean (SD) <sup>e</sup>           | 25.5 (4.2)                          | 26.4 (4.5)  | 25.5 (4.2)                                     | 26.3 (4.4)  | 25.1 (3.9)                      | 25.9 (4.3)  | 25.7 (4.1)                              | 26.3 (4.6)  |
| Pack-years of smoking, mean (SD) <sup>f</sup>             | 12.0 (18.8)                         | 13.6 (19.7) | 12.0 (18.9)                                    | 12.4 (18.7) | 12.2 (19.0)                     | 13.4 (19.8) | 12.3 (19.0)                             | 15.1 (21.1) |
| History of diabetes mellitus, %                           | 11.5                                | 14.5        | 11.2                                           | 14.3        | 8.0                             | 10.6        | 10.5                                    | 14.9        |
| Physical activity, MET-hours/week, mean (SD) <sup>g</sup> | 21.2 (18.6)                         | 18.1 (15.9) | 21.5 (18.9)                                    | 18.5 (16.3) | 21.3 (20.2)                     | 20.8 (19.9) | 23.0 (20.8)                             | 17.5 (16.5) |
| Alcohol, g/day, mean (SD)                                 | 6.8 (9.6)                           | 6.2 (9.1)   | 6.9 (9.6)                                      | 6.2 (9.2)   | 6.8 (10.3)                      | 7.5 (10.9)  | 7.7 (11.0)                              | 6.6 (9.7)   |
| Multivitamin use, %                                       | 70.2                                | 72.3        | 69.9                                           | 72.7        | 53.0                            | 52.1        | 54.5                                    | 68.0        |

Abbreviations: NHS, Nurses' Health Study; HPFS, Health Professionals Follow-up Study; SD, standard deviation; BMI, body mass index; MET, metabolic equivalent task; NSAIDs, non-steroidal anti-inflammatory drugs.

<sup>a</sup> Follow-up time: antacids (NHS: 2002-2012; HPFS: 2006-2012), NSAIDs (NHS: 1992-2012; HPFS: 1988-2012), and antidepressants (NHS: 1998-2012; HPFS: 1992-2012).

<sup>b</sup> All variables are age-standardized except age.

<sup>c</sup> Percentages are of non-missing values.

<sup>d</sup> Percentages may not sum to 100% after rounding.

<sup>e</sup> Calculated as weight in kilograms divided by height in meters squared.

<sup>f</sup> Cumulative among ever smokers.

<sup>g</sup> Weekly energy expenditure in MET-hours/week from recreational and leisure time physical activity.

**Supplementary Table 4. Recent change in antidiabetic, anticoagulant, and antihypertensive medication use and 2-year risk of pancreatic cancer diagnosis in the pooled NHS and HPFS cohorts**

|                                                         | Recent change in medication use <sup>a,b</sup> |                  |                  |
|---------------------------------------------------------|------------------------------------------------|------------------|------------------|
|                                                         | No change                                      | Start            | Stop             |
| <b>Antidiabetic medications</b>                         |                                                |                  |                  |
| No. of cases                                            | 538                                            | 33               | 17               |
| Person-years                                            | 1,966,617                                      | 33,435           | 15,660           |
| Incidence rate (per 100,000 person-years)               | 27 (25-30)                                     | 99 (70-139)      | 109 (67-175)     |
| Unadjusted                                              | 1 [Ref]                                        | 3.61 (2.54-5.13) | 3.97 (2.45-6.43) |
| Age-adjusted <sup>c</sup>                               | 1                                              | 2.99 (2.10-4.27) | 2.76 (1.70-4.50) |
| Age-adjusted <sup>c</sup> (+ BMI + history of diabetes) | 1                                              | 1.93 (1.28-2.91) | 1.77 (1.04-3.01) |
| MV-adjusted <sup>d</sup>                                | 1                                              | 1.99 (1.30-3.03) | 1.55 (0.86-2.81) |
| MV-adjusted <sup>e</sup> (replace BMI with weight loss) | 1                                              | 2.13 (1.40-3.25) | 1.38 (0.76-2.50) |
| <b>Oral hypoglycemic medications</b>                    |                                                |                  |                  |
| No. of cases                                            | 549                                            | 22               | 17               |
| Person-years                                            | 1,974,953                                      | 26,767           | 13,992           |
| Incidence rate (per 100,000 person-years)               | 28 (26-30)                                     | 82 (54-125)      | 121 (76-195)     |
| Unadjusted                                              | 1                                              | 2.96 (1.93-4.53) | 4.37 (2.70-7.08) |
| Age-adjusted <sup>c</sup>                               | 1                                              | 2.40 (1.56-3.69) | 3.11 (1.91-5.06) |
| Age-adjusted <sup>c</sup> (+ BMI + history of diabetes) | 1                                              | 1.47 (0.92-2.34) | 1.87 (1.11-3.16) |
| MV-adjusted <sup>d</sup>                                | 1                                              | 1.39 (0.86-2.27) | 2.04 (1.09-3.82) |
| MV-adjusted <sup>e</sup> (replace BMI with weight loss) | 1                                              | 1.49 (0.92-2.44) | 1.87 (1.00-3.50) |
| <b>Insulin</b>                                          |                                                |                  |                  |
| No. of cases                                            | 570                                            | 13               | 5                |
| Person-years                                            | 2,002,769                                      | 8,653            | 4,290            |
| Incidence rate (per 100,000 person-years)               | 28 (26-31)                                     | 150 (87-259)     | 117 (49-280)     |
| Unadjusted                                              | 1                                              | 5.28 (3.05-9.15) | 4.10 (1.70-9.88) |
| Age-adjusted <sup>c</sup>                               | 1                                              | 4.69 (2.69-8.18) | 2.83 (1.17-6.87) |
| Age-adjusted <sup>c</sup> (+ BMI + history of diabetes) | 1                                              | 2.74 (1.53-4.91) | 1.67 (0.68-4.11) |
| MV-adjusted <sup>d</sup>                                | 1                                              | 2.84 (1.58-5.12) | 1.18 (0.43-3.24) |
| MV-adjusted <sup>e</sup> (replace BMI with weight loss) | 1                                              | 3.10 (1.72-5.59) | 0.99 (0.36-2.73) |
| <b>Anticoagulant medications</b>                        |                                                |                  |                  |
| No. of cases                                            | 658                                            | 20               | 10               |
| Person-years                                            | 1,754,044                                      | 25,461           | 12,227           |
| Incidence rate (per 100,000 person-years)               | 38 (35-40)                                     | 79 (51-122)      | 82 (44-152)      |
| Unadjusted                                              | 1                                              | 2.09 (1.34-3.27) | 2.18 (1.17-4.07) |
| Age-adjusted <sup>c</sup>                               | 1                                              | 1.60 (1.02-2.52) | 1.52 (0.81-2.87) |
| MV-adjusted <sup>d</sup>                                | 1                                              | 1.50 (0.95-2.35) | 1.18 (0.57-2.46) |
| MV-adjusted <sup>e</sup> (replace BMI with weight loss) | 1                                              | 1.50 (0.96-2.36) | 1.08 (0.52-2.26) |
| <b>Antihypertensive medications</b>                     |                                                |                  |                  |
| No. of cases                                            | 789                                            | 86               | 116              |
| Person-years                                            | 2,627,927                                      | 224,273          | 141,857          |
| Incidence rate (per 100,000 person-years)               | 30 (28-32)                                     | 38 (31-47)       | 82 (68-98)       |
| Unadjusted                                              | 1                                              | 1.28 (1.02-1.60) | 2.72 (2.24-3.31) |
| Age-adjusted <sup>c</sup>                               | 1                                              | 1.04 (0.83-1.31) | 1.95 (1.60-2.38) |
| MV-adjusted <sup>d</sup>                                | 1                                              | 1.03 (0.81-1.30) | 1.77 (1.42-2.20) |
| MV-adjusted <sup>e</sup> (replace BMI with weight loss) | 1                                              | 1.08 (0.86-1.37) | 1.63 (1.30-2.03) |

Abbreviations: NHS, Nurses' Health Study; HPFS, Health Professionals Follow-up Study; MV, multivariate; BMI, body mass index; MET, metabolic equivalent task.

<sup>a</sup> Follow-up time: antidiabetic medications (NHS: 1990-2012; information on antidiabetic medication use in HPFS was assessed relatively late (in 2008 and afterwards) and was therefore not included in the analyses), anticoagulant (NHS: 1996-2012; HPFS: 1998-2012), and antihypertensive medications (NHS: 1990-2012; HPFS: 1988-2012).

<sup>b</sup> Medication change was measured by comparing questionnaires returned at a median of 1 year (current status of use) and 3 years (previous status of use) before pancreatic cancer diagnosis.

<sup>c</sup> Stratified by age (in months), sex/cohort (women, men; in the pooled analyses only), and calendar year of the survey cycle (each 2-year interval).

<sup>d</sup> Stratified by age (in months), sex/cohort (women, men; in the pooled analyses only), and calendar year of the survey cycle (each 2-year interval); adjusted for race/ethnicity (white, black, other, unknown), BMI (continuous, kg/m<sup>2</sup>), physical activity (continuous, MET-hours/week), smoking (continuous, pack-years), alcohol intake (continuous, grams/day), history of diabetes (yes, no), multivitamin use (yes, no), and previous status of use (yes, no).

<sup>e</sup> Replace BMI (continuous, kg/m<sup>2</sup>) with recent weight loss (no, ≤5%, 5% < to ≤ 10%, and >10% weight loss).

**Supplementary Table 5. Recent change in antacid, NSAIDs, and antidepressant medication use and 2-year risk of pancreatic cancer diagnosis in the pooled NHS and HPFS cohorts**

|                                                         | Recent change in medication use <sup>a,b</sup> |                  |                  |
|---------------------------------------------------------|------------------------------------------------|------------------|------------------|
|                                                         | No change                                      | Start            | Stop             |
| <b>Antacids</b>                                         |                                                |                  |                  |
| No. of cases                                            | 229                                            | 21               | 19               |
| Person-years                                            | 539,960                                        | 62,898           | 45,475           |
| Incidence rate (per 100,000 person-years)               | 42 (37-48)                                     | 33 (22-51)       | 42 (27-66)       |
| Unadjusted                                              | 1 [Ref]                                        | 0.79 (0.50-1.23) | 0.99 (0.62-1.57) |
| Age-adjusted <sup>c</sup>                               | 1                                              | 0.81 (0.52-1.28) | 1.01 (0.63-1.62) |
| MV-adjusted <sup>d</sup>                                | 1                                              | 0.76 (0.48-1.21) | 1.06 (0.58-1.93) |
| MV-adjusted <sup>e</sup> (replace BMI with weight loss) | 1                                              | 0.76 (0.48-1.20) | 1.04 (0.57-1.90) |
| <b>NSAIDs</b>                                           |                                                |                  |                  |
| No. of cases                                            | 800                                            | 49               | 54               |
| Person-years                                            | 2,333,006                                      | 148,689          | 129,881          |
| Incidence rate (per 100,000 person-years)               | 34 (32-37)                                     | 33 (25-44)       | 42 (32-54)       |
| Unadjusted                                              | 1                                              | 0.96 (0.72-1.28) | 1.21 (0.92-1.60) |
| Age-adjusted <sup>c</sup>                               | 1                                              | 0.96 (0.71-1.29) | 1.17 (0.88-1.55) |
| MV-adjusted <sup>d</sup>                                | 1                                              | 1.04 (0.76-1.42) | 1.14 (0.85-1.52) |
| MV-adjusted <sup>e</sup> (replace BMI with weight loss) | 1                                              | 1.01 (0.74-1.38) | 1.15 (0.86-1.54) |
| <b>Antidepressants</b>                                  |                                                |                  |                  |
| No. of cases                                            | 707                                            | 20               | 28               |
| Person-years                                            | 1,790,806                                      | 51,326           | 38,441           |
| Incidence rate (per 100,000 person-years)               | 39 (37-42)                                     | 39 (25-60)       | 73 (50-105)      |
| Unadjusted                                              | 1                                              | 0.99 (0.63-1.54) | 1.84 (1.26-2.69) |
| Age-adjusted <sup>c</sup>                               | 1                                              | 1.05 (0.67-1.65) | 1.88 (1.28-2.75) |
| MV-adjusted <sup>d</sup>                                | 1                                              | 0.99 (0.63-1.55) | 1.39 (0.85-2.27) |
| MV-adjusted <sup>e</sup> (replace BMI with weight loss) | 1                                              | 0.99 (0.63-1.55) | 1.30 (0.79-2.13) |

Abbreviations: NHS, Nurses' Health Study; HPFS, Health Professionals Follow-up Study; MV, multivariate; BMI, body mass index; MET, metabolic equivalent task; NSAIDs, non-steroidal anti-inflammatory drugs.

<sup>a</sup> Follow-up time: antacids (NHS: 2002-2012; HPFS: 2006-2012), NSAIDs (NHS: 1992-2012; HPFS: 1988-2012), and antidepressants (NHS: 1998-2012; HPFS: 1992-2012).

<sup>b</sup> Medication change was measured by comparing questionnaires returned at a median of 1 year (current status of use) and 3 years (previous status of use) before pancreatic cancer diagnosis.

<sup>c</sup> Stratified by age (in months), sex/cohort (women, men; in the pooled analyses only), and calendar year of the survey cycle (each 2-year interval).

<sup>d</sup> Stratified by age (in months), sex/cohort (women, men; in the pooled analyses only), and calendar year of the survey cycle (each 2-year interval); adjusted for race/ethnicity (white, black, other, unknown), BMI (continuous, kg/m<sup>2</sup>), physical activity (continuous, MET-hours/week), smoking (continuous, pack-years), alcohol intake (continuous, grams/day), history of diabetes (yes, no), multivitamin use (yes, no), and previous status of use (yes, no).

<sup>e</sup> Replace BMI (continuous, kg/m<sup>2</sup>) with recent weight loss (no, ≤5%, 5%< to ≤10%, and >10% weight loss).

**Supplementary Table 6. Sensitivity analysis of recent change in antidiabetic, anticoagulant, and antihypertensive medication use and 2-year risk of pancreatic cancer diagnosis in the pooled NHS and HPFS cohorts with four-category medication change exposure variable**

|                                                         | Recent change in medication use <sup>a,b</sup> |                  |                  |                  |
|---------------------------------------------------------|------------------------------------------------|------------------|------------------|------------------|
|                                                         | Not use and stable                             | Use and stable   | Start            | Stop             |
| <b>Antidiabetic medications</b>                         |                                                |                  |                  |                  |
| No. of cases                                            | 507                                            | 31               | 33               | 17               |
| Person-years                                            | 1,910,113                                      | 56,504           | 33,435           | 15,660           |
| Incidence rate (per 100,000 person-years)               | 27 (24-29)                                     | 55 (39-78)       | 99 (70-139)      | 109 (67-175)     |
| Unadjusted                                              | 1 [Ref]                                        | 2.07 (1.44-2.97) | 3.72 (2.61-5.29) | 4.09 (2.52-6.63) |
| Age-adjusted <sup>c</sup>                               | 1                                              | 1.69 (1.17-2.43) | 3.07 (2.15-4.38) | 2.84 (1.74-4.63) |
| Age-adjusted <sup>c</sup> (+ BMI + history of diabetes) | 1                                              | 1.08 (0.68-1.71) | 1.99 (1.27-3.13) | 1.83 (1.04-3.21) |
| MV-adjusted <sup>d</sup>                                | 1                                              | 0.78 (0.35-1.74) | 1.87 (1.17-2.98) | 1.24 (0.49-3.15) |
| MV-adjusted <sup>e</sup> (replace BMI with weight loss) | 1                                              | 0.84 (0.38-1.89) | 2.05 (1.28-3.26) | 1.19 (0.47-3.03) |
| <b>Oral hypoglycemic medications</b>                    |                                                |                  |                  |                  |
| No. of cases                                            | 525                                            | 24               | 22               | 17               |
| Person-years                                            | 1,930,135                                      | 44,818           | 26,767           | 13,992           |
| Incidence rate (per 100,000 person-years)               | 27 (25-30)                                     | 54 (36-80)       | 82 (54-125)      | 121 (76-195)     |
| Unadjusted                                              | 1                                              | 1.97 (1.31-2.96) | 3.02 (1.97-4.63) | 4.47 (2.76-7.24) |
| Age-adjusted <sup>c</sup>                               | 1                                              | 1.56 (1.03-2.35) | 2.44 (1.59-3.76) | 3.17 (1.94-5.16) |
| Age-adjusted <sup>c</sup> (+ BMI + history of diabetes) | 1                                              | 0.88 (0.55-1.41) | 1.41 (0.87-2.30) | 1.80 (1.05-3.09) |
| MV-adjusted <sup>d</sup>                                | 1                                              | 0.86 (0.54-1.39) | 1.39 (0.86-2.27) | 1.76 (1.03-3.03) |
| MV-adjusted <sup>e</sup> (replace BMI with weight loss) | 1                                              | 0.97 (0.60-1.56) | 1.49 (0.92-2.44) | 1.81 (1.05-3.10) |
| <b>Insulin</b>                                          |                                                |                  |                  |                  |
| No. of cases                                            | 554                                            | 16               | 13               | 5                |
| Person-years                                            | 1,981,445                                      | 21,324           | 8,653            | 4,290            |
| Incidence rate (per 100,000 person-years)               | 28 (26-30)                                     | 75 (46-122)      | 150 (87-259)     | 117 (49-280)     |
| Unadjusted                                              | 1                                              | 2.68 (1.63-4.41) | 5.37 (3.10-9.31) | 4.17 (1.73-10.1) |
| Age-adjusted <sup>c</sup>                               | 1                                              | 2.39 (1.45-3.95) | 4.77 (2.74-8.32) | 2.89 (1.19-7.00) |
| Age-adjusted <sup>c</sup> (+ BMI + history of diabetes) | 1                                              | 1.45 (0.85-2.47) | 2.88 (1.60-5.18) | 1.75 (0.71-4.33) |
| MV-adjusted <sup>d</sup>                                | 1                                              | 1.43 (0.84-2.45) | 2.84 (1.58-5.12) | 1.69 (0.68-4.19) |
| MV-adjusted <sup>e</sup> (replace BMI with weight loss) | 1                                              | 1.54 (0.90-2.64) | 3.10 (1.72-5.59) | 1.53 (0.62-3.79) |
| <b>Anticoagulant medications</b>                        |                                                |                  |                  |                  |
| No. of cases                                            | 631                                            | 27               | 20               | 10               |
| Person-years                                            | 1,717,186                                      | 36,859           | 25,461           | 12,227           |
| Incidence rate (per 100,000 person-years)               | 37 (34-40)                                     | 73 (50-107)      | 79 (51-122)      | 82 (44-152)      |
| Unadjusted                                              | 1                                              | 1.99 (1.36-2.93) | 2.14 (1.37-3.34) | 2.23 (1.19-4.16) |
| Age-adjusted <sup>c</sup>                               | 1                                              | 1.26 (0.85-1.87) | 1.62 (1.03-2.55) | 1.54 (0.82-2.91) |
| MV-adjusted <sup>d</sup>                                | 1                                              | 1.16 (0.78-1.72) | 1.50 (0.95-2.35) | 1.37 (0.73-2.59) |
| MV-adjusted <sup>e</sup> (replace BMI with weight loss) | 1                                              | 1.21 (0.82-1.79) | 1.50 (0.96-2.36) | 1.31 (0.69-2.47) |
| <b>Antihypertensive medications</b>                     |                                                |                  |                  |                  |
| No. of cases                                            | 503                                            | 286              | 86               | 116              |
| Person-years                                            | 1,933,444                                      | 694,483          | 224,273          | 141,857          |
| Incidence rate (per 100,000 person-years)               | 26 (24-28)                                     | 41 (37-46)       | 38 (31-47)       | 82 (68-98)       |
| Unadjusted                                              | 1                                              | 1.58 (1.37-1.83) | 1.47 (1.17-1.85) | 3.14 (2.57-3.85) |
| Age-adjusted <sup>c</sup>                               | 1                                              | 1.16 (1.00-1.35) | 1.10 (0.87-1.39) | 2.06 (1.68-2.54) |
| MV-adjusted <sup>d</sup>                                | 1                                              | 1.06 (0.91-1.24) | 1.03 (0.81-1.30) | 1.88 (1.52-2.32) |
| MV-adjusted <sup>e</sup> (replace BMI with weight loss) | 1                                              | 1.14 (0.98-1.34) | 1.08 (0.86-1.37) | 1.87 (1.51-2.30) |

Abbreviations: NHS, Nurses' Health Study; HPFS, Health Professionals Follow-up Study; MV, multivariate; BMI, body mass index; MET, metabolic equivalent task.

<sup>a</sup> Follow-up time: antidiabetic medications (NHS: 1990-2012; information on antidiabetic medication use in HPFS was assessed relatively late (in 2008 and afterwards) and was therefore not included in the analyses), anticoagulant (NHS: 1996-2012; HPFS: 1998-2012), and antihypertensive medications (NHS: 1990-2012; HPFS: 1988-2012).

<sup>b</sup> Medication change was measured by comparing questionnaires returned at a median of 1 year (current status of use) and 3 years (previous status of use) before pancreatic cancer diagnosis. Stable refers to medication use or non-use that remained unchanged in the two-year time window, which includes two possible scenarios: stable use and stable non-use over the two years.

<sup>c</sup> Stratified by age (in months), sex/cohort (women, men; in the pooled analyses only), and calendar year of the survey cycle (each 2-year interval).

<sup>d</sup> Stratified by age (in months), sex/cohort (women, men; in the pooled analyses only), and calendar year of the survey cycle (each 2-year interval); adjusted for race/ethnicity (white, black, other, unknown), BMI (continuous, kg/m<sup>2</sup>), physical activity (continuous, MET-hours/week), smoking (continuous, pack-years), alcohol intake (continuous, grams/day), history of diabetes (yes, no), multivitamin use (yes, no), and previous status of use (yes, no).

<sup>e</sup> Replace BMI (continuous, kg/m<sup>2</sup>) with recent weight loss (no, ≤5%, 5%< to ≤10%, and >10% weight loss).

**Supplementary Table 7. Sensitivity analysis of recent change in antacid, NSAIDs, and antidepressant medication use and 2-year risk of pancreatic cancer diagnosis in the pooled NHS and HPFS cohorts with four-category medication change exposure variable**

|                                                         | Recent change in medication use <sup>a,b</sup> |                  |                  |                  |
|---------------------------------------------------------|------------------------------------------------|------------------|------------------|------------------|
|                                                         | Not use and stable                             | Use and stable   | Start            | Stop             |
| <b>Antacids</b>                                         |                                                |                  |                  |                  |
| No. of cases                                            | 202                                            | 27               | 21               | 19               |
| Person-years                                            | 470,356                                        | 69,604           | 62,898           | 45,475           |
| Incidence rate (per 100,000 person-years)               | 43 (37-49)                                     | 39 (27-57)       | 33 (22-51)       | 42 (27-66)       |
| Unadjusted                                              | 1 [Ref]                                        | 0.90 (0.60-1.35) | 0.78 (0.50-1.22) | 0.97 (0.61-1.56) |
| Age-adjusted <sup>c</sup>                               | 1                                              | 0.89 (0.60-1.34) | 0.80 (0.51-1.26) | 0.99 (0.62-1.60) |
| MV-adjusted <sup>d</sup>                                | 1                                              | 0.96 (0.37-2.48) | 0.76 (0.47-1.23) | 1.03 (0.37-2.88) |
| MV-adjusted <sup>e</sup> (replace BMI with weight loss) | 1                                              | 0.96 (0.37-2.48) | 0.75 (0.46-1.23) | 1.01 (0.36-2.84) |
| <b>NSAIDs</b>                                           |                                                |                  |                  |                  |
| No. of cases                                            | 283                                            | 517              | 49               | 54               |
| Person-years                                            | 981,890                                        | 1,351,116        | 148,689          | 129,881          |
| Incidence rate (per 100,000 person-years)               | 29 (26-32)                                     | 38 (35-42)       | 33 (25-44)       | 42 (32-54)       |
| Unadjusted                                              | 1                                              | 1.33 (1.15-1.53) | 1.14 (0.84-1.55) | 1.44 (1.08-1.93) |
| Age-adjusted <sup>c</sup>                               | 1                                              | 1.17 (1.01-1.35) | 1.06 (0.77-1.44) | 1.29 (0.95-1.74) |
| MV-adjusted <sup>d</sup>                                | 1                                              | 1.10 (0.95-1.28) | 1.04 (0.76-1.42) | 1.25 (0.92-1.69) |
| MV-adjusted <sup>e</sup> (replace BMI with weight loss) | 1                                              | 1.08 (0.93-1.25) | 1.01 (0.74-1.38) | 1.24 (0.92-1.68) |
| <b>Antidepressants</b>                                  |                                                |                  |                  |                  |
| No. of cases                                            | 669                                            | 38               | 20               | 28               |
| Person-years                                            | 1,711,778                                      | 79,028           | 51,326           | 38,441           |
| Incidence rate (per 100,000 person-years)               | 39 (36-42)                                     | 48 (35-66)       | 39 (25-60)       | 73 (50-105)      |
| Unadjusted                                              | 1                                              | 1.23 (0.89-1.71) | 1.00 (0.64-1.56) | 1.86 (1.28-2.72) |
| Age-adjusted <sup>c</sup>                               | 1                                              | 1.39 (1.00-1.94) | 1.07 (0.68-1.68) | 1.91 (1.31-2.81) |
| MV-adjusted <sup>d</sup>                                | 1                                              | 1.28 (0.91-1.78) | 0.99 (0.63-1.55) | 1.77 (1.20-2.59) |
| MV-adjusted <sup>e</sup> (replace BMI with weight loss) | 1                                              | 1.31 (0.94-1.84) | 0.99 (0.63-1.55) | 1.71 (1.16-2.51) |

Abbreviations: NHS, Nurses' Health Study; HPFS, Health Professionals Follow-up Study; MV, multivariate; BMI, body mass index; MET, metabolic equivalent task; NSAIDs, non-steroidal anti-inflammatory drugs.

<sup>a</sup> Follow-up time: antacids (NHS: 2002-2012; HPFS: 2006-2012), NSAIDs (NHS: 1992-2012; HPFS: 1988-2012), and antidepressants (NHS: 1998-2012; HPFS: 1992-2012).

<sup>b</sup> Medication change was measured by comparing questionnaires returned at a median of 1 year (current status of use) and 3 years (previous status of use) before pancreatic cancer diagnosis. Stable refers to medication use or non-use that remained unchanged in the two-year time window, which includes two possible scenarios: stable use and stable non-use over the two years.

<sup>c</sup> Stratified by age (in months), sex/cohort (women, men; in the pooled analyses only), and calendar year of the survey cycle (each 2-year interval).

<sup>d</sup> Stratified by age (in months), sex/cohort (women, men; in the pooled analyses only), and calendar year of the survey cycle (each 2-year interval); adjusted for race/ethnicity (white, black, other, unknown), BMI (continuous, kg/m<sup>2</sup>), physical activity (continuous, MET-hours/week), smoking (continuous, pack-years), alcohol intake (continuous, grams/day), history of diabetes (yes, no), multivitamin use (yes, no), and previous status of use (yes, no).

<sup>e</sup> Replace BMI (continuous, kg/m<sup>2</sup>) with recent weight loss (no, ≤5%, 5%< to ≤10%, and >10% weight loss).



**Supplementary Table 8. Recent change in antidiabetic, anticoagulant, and antihypertensive medication use and 2-year risk of pancreatic cancer diagnosis in the NHS cohort**

|                                                         | Recent change in medication use <sup>a,b</sup> |                  |                  |
|---------------------------------------------------------|------------------------------------------------|------------------|------------------|
|                                                         | No change                                      | Start            | Stop             |
| <b>Antidiabetic medications</b>                         |                                                |                  |                  |
| No. of cases                                            | 538                                            | 33               | 17               |
| Person-years                                            | 1,966,617                                      | 33,435           | 15,660           |
| Incidence rate (per 100,000 person-years)               | 27 (25-30)                                     | 99 (70-139)      | 109 (67-175)     |
| Unadjusted                                              | 1 [Ref]                                        | 3.61 (2.54-5.13) | 3.97 (2.45-6.43) |
| Age-adjusted <sup>c</sup>                               | 1                                              | 2.99 (2.10-4.27) | 2.76 (1.70-4.50) |
| MV-adjusted <sup>d</sup>                                | 1                                              | 1.99 (1.30-3.04) | 1.55 (0.86-2.81) |
| MV-adjusted <sup>e</sup> (replace BMI with weight loss) | 1                                              | 2.13 (1.40-3.26) | 1.38 (0.76-2.51) |
| <b>Oral hypoglycemic medications</b>                    |                                                |                  |                  |
| No. of cases                                            | 549                                            | 22               | 17               |
| Person-years                                            | 1,974,953                                      | 26,767           | 13,992           |
| Incidence rate (per 100,000 person-years)               | 28 (26-30)                                     | 82 (54-125)      | 121 (76-195)     |
| Unadjusted                                              | 1                                              | 2.96 (1.93-4.53) | 4.37 (2.70-7.08) |
| Age-adjusted <sup>c</sup>                               | 1                                              | 2.40 (1.56-3.69) | 3.11 (1.91-5.06) |
| MV-adjusted <sup>d</sup>                                | 1                                              | 1.40 (0.86-2.27) | 2.04 (1.09-3.82) |
| MV-adjusted <sup>e</sup> (replace BMI with weight loss) | 1                                              | 1.50 (0.92-2.44) | 1.87 (1.00-3.50) |
| <b>Insulin</b>                                          |                                                |                  |                  |
| No. of cases                                            | 570                                            | 13               | 5                |
| Person-years                                            | 2,002,769                                      | 8,653            | 4,290            |
| Incidence rate (per 100,000 person-years)               | 28 (26-31)                                     | 150 (87-259)     | 117 (49-280)     |
| Unadjusted                                              | 1                                              | 5.28 (3.05-9.15) | 4.10 (1.70-9.88) |
| Age-adjusted <sup>c</sup>                               | 1                                              | 4.69 (2.69-8.18) | 2.83 (1.17-6.87) |
| MV-adjusted <sup>d</sup>                                | 1                                              | 2.84 (1.58-5.12) | 1.18 (0.43-3.24) |
| MV-adjusted <sup>e</sup> (replace BMI with weight loss) | 1                                              | 3.10 (1.72-5.59) | 0.99 (0.36-2.73) |
| <b>Anticoagulant medications</b>                        |                                                |                  |                  |
| No. of cases                                            | 444                                            | 15               | 6                |
| Person-years                                            | 1,306,962                                      | 17,448           | 8,517            |
| Incidence rate (per 100,000 person-years)               | 34 (31-37)                                     | 86 (52-143)      | 70 (32-157)      |
| Unadjusted                                              | 1                                              | 2.53 (1.51-4.23) | 2.07 (0.93-4.64) |
| Age-adjusted <sup>c</sup>                               | 1                                              | 1.97 (1.17-3.31) | 1.55 (0.69-3.49) |
| MV-adjusted <sup>d</sup>                                | 1                                              | 1.83 (1.09-3.08) | 1.15 (0.44-2.99) |
| MV-adjusted <sup>e</sup> (replace BMI with weight loss) | 1                                              | 1.85 (1.10-3.12) | 1.04 (0.40-2.69) |
| <b>Antihypertensive medications</b>                     |                                                |                  |                  |
| No. of cases                                            | 454                                            | 58               | 76               |
| Person-years                                            | 1,767,534                                      | 154,675          | 93,504           |
| Incidence rate (per 100,000 person-years)               | 26 (23-28)                                     | 37 (29-49)       | 81 (65-102)      |
| Unadjusted                                              | 1                                              | 1.46 (1.11-1.92) | 3.16 (2.48-4.03) |
| Age-adjusted <sup>c</sup>                               | 1                                              | 1.21 (0.92-1.59) | 2.30 (1.79-2.95) |
| MV-adjusted <sup>d</sup>                                | 1                                              | 1.21 (0.90-1.61) | 2.05 (1.57-2.69) |
| MV-adjusted <sup>e</sup> (replace BMI with weight loss) | 1                                              | 1.32 (0.98-1.76) | 1.85 (1.40-2.43) |

Abbreviations: NHS, Nurses' Health Study; MV, multivariate; BMI, body mass index; MET, metabolic equivalent task.

<sup>a</sup> Follow-up time: antidiabetic medications (NHS: 1990-2012), anticoagulant (NHS: 1996-2012), and antihypertensive medications (NHS: 1990-2012).

<sup>b</sup> Medication change was measured by comparing questionnaires returned at a median of 1 year (current status of use) and 3 years (previous status of use) before pancreatic cancer diagnosis.

<sup>c</sup> Stratified by age (in months) and calendar year of the survey cycle (each 2-year interval).

<sup>d</sup> Stratified by age (in months) and calendar year of the survey cycle (each 2-year interval); adjusted for race/ethnicity (white, black, other, unknown), BMI (continuous, kg/m<sup>2</sup>), physical activity (continuous, MET-hours/week), smoking (continuous, pack-years), alcohol intake (continuous, grams/day), history of diabetes (yes, no), multivitamin use (yes, no), and previous status of use (yes, no).

<sup>e</sup> Replace BMI (continuous, kg/m<sup>2</sup>) with recent weight loss (no, ≤5%, 5%< to ≤10%, and >10% weight loss).

**Supplementary Table 9. Recent change in antacid, NSAIDs, and antidepressant medication use and 2-year risk of pancreatic cancer diagnosis in the NHS cohort**

|                                                         | Recent change in medication use <sup>a,b</sup> |                  |                  |
|---------------------------------------------------------|------------------------------------------------|------------------|------------------|
|                                                         | No change                                      | Start            | Stop             |
| <b>Antacids</b>                                         |                                                |                  |                  |
| No. of cases                                            | 187                                            | 16               | 14               |
| Person-years                                            | 445,780                                        | 55,671           | 38,415           |
| Incidence rate (per 100,000 person-years)               | 42 (36-48)                                     | 29 (18-47)       | 36 (22-62)       |
| Unadjusted                                              | 1 [Ref]                                        | 0.69 (0.41-1.14) | 0.87 (0.50-1.50) |
| Age-adjusted <sup>c</sup>                               | 1                                              | 0.70 (0.42-1.18) | 0.91 (0.53-1.58) |
| MV-adjusted <sup>d</sup>                                | 1                                              | 0.67 (0.40-1.14) | 0.92 (0.47-1.81) |
| MV-adjusted <sup>e</sup> (replace BMI with weight loss) | 1                                              | 0.67 (0.40-1.14) | 0.90 (0.46-1.76) |
| <b>NSAIDs</b>                                           |                                                |                  |                  |
| No. of cases                                            | 532                                            | 15               | 15               |
| Person-years                                            | 1,661,939                                      | 57,172           | 63,333           |
| Incidence rate (per 100,000 person-years)               | 32 (29-35)                                     | 26 (16-44)       | 24 (14-39)       |
| Unadjusted                                              | 1                                              | 0.82 (0.49-1.37) | 0.74 (0.44-1.24) |
| Age-adjusted <sup>c</sup>                               | 1                                              | 0.92 (0.55-1.54) | 0.89 (0.53-1.49) |
| MV-adjusted <sup>d</sup>                                | 1                                              | 1.03 (0.60-1.74) | 0.84 (0.50-1.41) |
| MV-adjusted <sup>e</sup> (replace BMI with weight loss) | 1                                              | 0.94 (0.55-1.60) | 0.86 (0.51-1.44) |
| <b>Antidepressants</b>                                  |                                                |                  |                  |
| No. of cases                                            | 393                                            | 17               | 19               |
| Person-years                                            | 1,050,746                                      | 38,488           | 29,469           |
| Incidence rate (per 100,000 person-years)               | 37 (34-41)                                     | 44 (27-71)       | 64 (41-101)      |
| Unadjusted                                              | 1                                              | 1.18 (0.73-1.92) | 1.72 (1.09-2.73) |
| Age-adjusted <sup>c</sup>                               | 1                                              | 1.27 (0.78-2.07) | 1.76 (1.11-2.81) |
| MV-adjusted <sup>d</sup>                                | 1                                              | 1.18 (0.73-1.93) | 1.54 (0.84-2.80) |
| MV-adjusted <sup>e</sup> (replace BMI with weight loss) | 1                                              | 1.20 (0.73-1.96) | 1.42 (0.78-2.60) |

Abbreviations: NHS, Nurses' Health Study; MV, multivariate; BMI, body mass index; MET, metabolic equivalent task; NSAIDs, non-steroidal anti-inflammatory drugs.

<sup>a</sup> Follow-up time: antacids (NHS: 2002-2012), NSAIDs (NHS: 1992-2012), and antidepressants (NHS: 1998-2012).

<sup>b</sup> Medication change was measured by comparing questionnaires returned at a median of 1 year (current status of use) and 3 years (previous status of use) before pancreatic cancer diagnosis.

<sup>c</sup> Stratified by age (in months) and calendar year of the survey cycle (each 2-year interval).

<sup>d</sup> Stratified by age (in months) and calendar year of the survey cycle (each 2-year interval); adjusted for race/ethnicity (white, black, other, unknown), BMI (continuous, kg/m<sup>2</sup>), physical activity (continuous, MET-hours/week), smoking (continuous, pack-years), alcohol intake (continuous, grams/day), history of diabetes (yes, no), multivitamin use (yes, no), and previous status of use (yes, no).

<sup>e</sup> Replace BMI (continuous, kg/m<sup>2</sup>) with recent weight loss (no, ≤5%, 5%< to ≤ 10%, and >10% weight loss).

**Supplementary Table 10. Recent change in anticoagulant and antihypertensive medication use and 2-year risk of pancreatic cancer diagnosis in the HPFS cohort**

|                                                         | Recent change in medication use <sup>a,b</sup> |                  |                  |
|---------------------------------------------------------|------------------------------------------------|------------------|------------------|
|                                                         | No change                                      | Start            | Stop             |
| <b>Anticoagulant medications</b>                        |                                                |                  |                  |
| No. of cases                                            | 214                                            | 5                | 4                |
| Person-years                                            | 447,083                                        | 8,013            | 3,711            |
| Incidence rate (per 100,000 person-years)               | 48 (42-55)                                     | 62 (26-150)      | 108 (40-287)     |
| Unadjusted                                              | 1 [Ref]                                        | 1.30 (0.54-3.16) | 2.25 (0.84-6.06) |
| Age-adjusted <sup>c</sup>                               | 1                                              | 1.02 (0.42-2.50) | 1.48 (0.53-4.08) |
| MV-adjusted <sup>d</sup>                                | 1                                              | 0.97 (0.39-2.38) | 1.22 (0.38-3.90) |
| MV-adjusted <sup>e</sup> (replace BMI with weight loss) | 1                                              | 0.94 (0.38-2.31) | 1.22 (0.38-3.89) |
| <b>Antihypertensive medications</b>                     |                                                |                  |                  |
| No. of cases                                            | 335                                            | 28               | 40               |
| Person-years                                            | 860,393                                        | 69,599           | 48,353           |
| Incidence rate (per 100,000 person-years)               | 39 (35-43)                                     | 40 (28-58)       | 83 (61-113)      |
| Unadjusted                                              | 1                                              | 1.03 (0.70-1.52) | 2.12 (1.53-2.95) |
| Age-adjusted <sup>c</sup>                               | 1                                              | 0.82 (0.55-1.21) | 1.50 (1.07-2.11) |
| MV-adjusted <sup>d</sup>                                | 1                                              | 0.79 (0.53-1.18) | 1.38 (0.95-2.01) |
| MV-adjusted <sup>e</sup> (replace BMI with weight loss) | 1                                              | 0.79 (0.53-1.19) | 1.30 (0.89-1.90) |

Abbreviations: HPFS, Health Professionals Follow-up Study; MV, multivariate; BMI, body mass index; MET, metabolic equivalent task.

<sup>a</sup> Follow-up time: antidiabetic medications (information on antidiabetic medication use in HPFS was assessed relatively late (in 2008 and afterwards) and was therefore not included in the analyses), anticoagulant (HPFS: 1998-2012), and antihypertensive medications (HPFS: 1988-2012).

<sup>b</sup> Medication change was measured by comparing questionnaires returned at a median of 1 year (current status of use) and 3 years (previous status of use) before pancreatic cancer diagnosis.

<sup>c</sup> Stratified by age (in months) and calendar year of the survey cycle (each 2-year interval).

<sup>d</sup> Stratified by age (in months) and calendar year of the survey cycle (each 2-year interval); adjusted for race/ethnicity (white, black, other, unknown), BMI (continuous, kg/m<sup>2</sup>), physical activity (continuous, MET-hours/week), smoking (continuous, pack-years), alcohol intake (continuous, grams/day), history of diabetes (yes, no), multivitamin use (yes, no), and previous status of use (yes, no).

<sup>e</sup> Replace BMI (continuous, kg/m<sup>2</sup>) with recent weight loss (no, ≤5%, 5%< to ≤10%, and >10% weight loss).

**Supplementary Table 11. Recent change in antacid, NSAIDs, and antidepressant medication use and 2-year risk of pancreatic cancer diagnosis in the HPFS cohort**

|                                                         | Recent change in medication use <sup>a,b</sup> |                  |                  |
|---------------------------------------------------------|------------------------------------------------|------------------|------------------|
|                                                         | No change                                      | Start            | Stop             |
| <b>Antacids</b>                                         |                                                |                  |                  |
| No. of cases                                            | 42                                             | 5                | 5                |
| Person-years                                            | 94,181                                         | 7,227            | 7,059            |
| Incidence rate (per 100,000 person-years)               | 45 (33-60)                                     | 69 (29-166)      | 71 (29-170)      |
| Unadjusted                                              | 1 [Ref]                                        | 1.55 (0.61-3.92) | 1.59 (0.63-4.01) |
| Age-adjusted <sup>c</sup>                               | 1                                              | 1.52 (0.59-3.90) | 1.44 (0.56-3.70) |
| MV-adjusted <sup>d</sup>                                | 1                                              | 1.29 (0.48-3.47) | 1.90 (0.47-7.64) |
| MV-adjusted <sup>e</sup> (replace BMI with weight loss) | 1                                              | 1.24 (0.46-3.35) | 1.93 (0.48-7.77) |
| <b>NSAIDs</b>                                           |                                                |                  |                  |
| No. of cases                                            | 268                                            | 34               | 39               |
| Person-years                                            | 671,067                                        | 91,516           | 66,548           |
| Incidence rate (per 100,000 person-years)               | 40 (35-45)                                     | 37 (27-52)       | 59 (43-80)       |
| Unadjusted                                              | 1                                              | 0.93 (0.65-1.33) | 1.47 (1.05-2.05) |
| Age-adjusted <sup>c</sup>                               | 1                                              | 0.99 (0.69-1.42) | 1.36 (0.96-1.92) |
| MV-adjusted <sup>d</sup>                                | 1                                              | 0.97 (0.66-1.45) | 1.40 (0.98-2.02) |
| MV-adjusted <sup>e</sup> (replace BMI with weight loss) | 1                                              | 0.98 (0.66-1.45) | 1.39 (0.97-2.00) |
| <b>Antidepressants</b>                                  |                                                |                  |                  |
| No. of cases                                            | 314                                            | 3                | 9                |
| Person-years                                            | 740,060                                        | 12,838           | 8,972            |
| Incidence rate (per 100,000 person-years)               | 42 (38-47)                                     | 23 (8-72)        | 100 (52-193)     |
| Unadjusted                                              | 1                                              | 0.55 (0.18-1.72) | 2.36 (1.22-4.59) |
| Age-adjusted <sup>c</sup>                               | 1                                              | 0.53 (0.17-1.66) | 2.20 (1.12-4.31) |
| MV-adjusted <sup>d</sup>                                | 1                                              | 0.50 (0.16-1.58) | 1.02 (0.43-2.42) |
| MV-adjusted <sup>e</sup> (replace BMI with weight loss) | 1                                              | 0.49 (0.16-1.55) | 0.96 (0.40-2.29) |

Abbreviations: HPFS, Health Professionals Follow-up Study; MV, multivariate; BMI, body mass index; MET, metabolic equivalent task; NSAIDs, non-steroidal anti-inflammatory drugs.

<sup>a</sup> Follow-up time: antacids (HPFS: 2006-2012), NSAIDs (HPFS: 1988-2012), and antidepressants (HPFS: 1992-2012).

<sup>b</sup> Medication change was measured by comparing questionnaires returned at a median of 1 year (current status of use) and 3 years (previous status of use) before pancreatic cancer diagnosis.

<sup>c</sup> Stratified by age (in months) and calendar year of the survey cycle (each 2-year interval).

<sup>d</sup> Stratified by age (in months) and calendar year of the survey cycle (each 2-year interval); adjusted for race/ethnicity (white, black, other, unknown), BMI (continuous, kg/m<sup>2</sup>), physical activity (continuous, MET-hours/week), smoking (continuous, pack-years), alcohol intake (continuous, grams/day), history of diabetes (yes, no), multivitamin use (yes, no), and previous status of use (yes, no).

<sup>e</sup> Replace BMI (continuous, kg/m<sup>2</sup>) with recent weight loss (no, ≤5%, 5%< to ≤ 10%, and >10% weight loss).

**Supplementary Table 12. Combined associations of recent changes in medication use with 2-year risk of pancreatic cancer diagnosis in the NHS cohort**

|                                                         | Number of medication changes<br>(starting antidiabetic, starting anticoagulant, and<br>stopping antihypertensive) <sup>a,b,c,d</sup> |                  |                  | <i>P</i> for trend <sup>e</sup> |
|---------------------------------------------------------|--------------------------------------------------------------------------------------------------------------------------------------|------------------|------------------|---------------------------------|
|                                                         | 0                                                                                                                                    | 1                | ≥ 2              |                                 |
| No. of cases                                            | 294                                                                                                                                  | 76               | 6                |                                 |
| Person-years                                            | 1,025,517                                                                                                                            | 98,969           | 3,668            |                                 |
| Incidence rate (per 100,000 person-years)               | 29 (26-32)                                                                                                                           | 77 (61-96)       | 164 (73-364)     |                                 |
| Unadjusted                                              | 1 [Ref]                                                                                                                              | 2.68 (2.08-3.45) | 5.71 (2.54-12.8) | <1×10 <sup>-5</sup>             |
| Age-adjusted <sup>f</sup>                               | 1                                                                                                                                    | 2.30 (1.78-2.98) | 4.04 (1.78-9.17) | <1×10 <sup>-5</sup>             |
| MV-adjusted <sup>g</sup>                                | 1                                                                                                                                    | 1.89 (1.41-2.52) | 3.05 (1.24-7.50) | <1×10 <sup>-5</sup>             |
| MV-adjusted <sup>h</sup> (replace BMI with weight loss) | 1                                                                                                                                    | 1.76 (1.32-2.36) | 2.72 (1.09-6.77) | 5×10 <sup>-5</sup>              |

Abbreviations: NHS, Nurses' Health Study; MV, multivariate; BMI: Body Mass Index; MET, metabolic equivalent task.

<sup>a</sup> Information on antidiabetic medication use in HPFS was assessed relatively late (in 2008 and afterwards), and therefore HPFS data was not included in the analyses of combined associations of starting antidiabetic medications, starting anticoagulant, and stopping antihypertensive medications.

<sup>b</sup> Follow-up time: combined associations of starting antidiabetic medications, starting anticoagulant, and stopping antihypertensive. Baseline was defined as 1996 because 1994 was the first year when information on use of antidiabetic medications, anticoagulant, and antihypertensive medications were all available.

<sup>c</sup> Medication change was measured by comparing questionnaires returned at a median of 1 year (current status of use) and 3 years (previous status of use) before pancreatic cancer diagnosis.

<sup>d</sup> Medication changes considered in this analysis include the start of antidiabetic or anticoagulant medications and the stop of antihypertensive medications.

<sup>e</sup> Two-sided *P* value for trend was calculated by entering the number of medication changes as an ordinal variable and assessed by the Wald test without correction for multiple comparisons. *P* value <1×10<sup>-5</sup> for trend in MV-adjusted analysis.

<sup>f</sup> Stratified by age (in months) and calendar year of the survey cycle (each 2-year interval).

<sup>g</sup> Stratified by age (in months) and calendar year of the survey cycle (each 2-year interval); adjusted for race/ethnicity (white, black, other, unknown), BMI (continuous, kg/m<sup>2</sup>), physical activity (continuous, MET-hours/week), smoking (continuous, pack-years), alcohol intake (continuous, grams/day), history of diabetes (yes, no), multivitamin use (yes, no), and previous status of use (yes, no).

<sup>h</sup> Replace BMI (continuous, kg/m<sup>2</sup>) with recent weight loss (no, ≤5%, 5%< to ≤10%, and >10% weight loss).

**Supplementary Table 13. Recent change in medication use and 2-year risk of other digestive system cancer diagnoses in the pooled NHS and HPFS cohorts <sup>a</sup>**

|                                                         | Recent change in medication use <sup>b,c</sup> |                  |                  |
|---------------------------------------------------------|------------------------------------------------|------------------|------------------|
|                                                         | No change                                      | Start            | Stop             |
| <b>Antidiabetic medications</b>                         |                                                |                  |                  |
| No. of cases                                            | 2,524                                          | 65               | 35               |
| Person-years                                            | 1,953,339                                      | 33,133           | 15,474           |
| Incidence rate (per 100,000 person-years)               | 129 (124-134)                                  | 196 (154-250)    | 226 (162-315)    |
| Unadjusted                                              | 1 [Ref]                                        | 1.52 (1.19-1.94) | 1.75 (1.25-2.44) |
| Age-adjusted <sup>d</sup>                               | 1                                              | 1.33 (1.04-1.70) | 1.33 (0.95-1.87) |
| MV-adjusted <sup>e</sup>                                | 1                                              | 1.09 (0.83-1.44) | 1.04 (0.70-1.54) |
| MV-adjusted <sup>f</sup> (replace BMI with weight loss) | 1                                              | 1.11 (0.84-1.47) | 1.01 (0.68-1.50) |
| <b>Oral hypoglycemic medications</b>                    |                                                |                  |                  |
| No. of cases                                            | 2538                                           | 48               | 38               |
| Person-years                                            | 1,961,622                                      | 26,498           | 13,825           |
| Incidence rate (per 100,000 person-years)               | 129 (124-135)                                  | 181 (137-240)    | 275 (200-378)    |
| Unadjusted                                              | 1                                              | 1.40 (1.05-1.86) | 2.12 (1.54-2.93) |
| Age-adjusted <sup>d</sup>                               | 1                                              | 1.23 (0.92-1.64) | 1.63 (1.17-2.26) |
| MV-adjusted <sup>e</sup>                                | 1                                              | 1.00 (0.73-1.37) | 1.36 (0.91-2.01) |
| MV-adjusted <sup>f</sup> (replace BMI with weight loss) | 1                                              | 1.02 (0.74-1.39) | 1.33 (0.90-1.97) |
| <b>Insulin</b>                                          |                                                |                  |                  |
| No. of cases                                            | 2598                                           | 21               | 5                |
| Person-years                                            | 1,989,111                                      | 8,593            | 4,241            |
| Incidence rate (per 100,000 person-years)               | 131 (126-136)                                  | 244 (159-375)    | 118 (49-283)     |
| Unadjusted                                              | 1                                              | 1.87 (1.22-2.87) | 0.90 (0.38-2.17) |
| Age-adjusted <sup>d</sup>                               | 1                                              | 1.63 (1.06-2.51) | 0.71 (0.29-1.71) |
| MV-adjusted <sup>e</sup>                                | 1                                              | 1.31 (0.84-2.04) | 0.51 (0.20-1.30) |
| MV-adjusted <sup>f</sup> (replace BMI with weight loss) | 1                                              | 1.35 (0.86-2.10) | 0.50 (0.20-1.26) |
| <b>Anticoagulant medications</b>                        |                                                |                  |                  |
| No. of cases                                            | 2741                                           | 55               | 22               |
| Person-years                                            | 1,743,068                                      | 25,141           | 12,050           |
| Incidence rate (per 100,000 person-years)               | 157 (151-163)                                  | 219 (168-285)    | 183 (120-277)    |
| Unadjusted                                              | 1                                              | 1.39 (1.07-1.82) | 1.16 (0.76-1.77) |
| Age-adjusted <sup>d</sup>                               | 1                                              | 1.09 (0.83-1.42) | 0.88 (0.58-1.35) |
| MV-adjusted <sup>e</sup>                                | 1                                              | 1.05 (0.80-1.37) | 0.63 (0.40-1.01) |
| MV-adjusted <sup>f</sup> (replace BMI with weight loss) | 1                                              | 1.05 (0.80-1.37) | 0.63 (0.40-1.00) |
| <b>Antihypertensive medications</b>                     |                                                |                  |                  |
| No. of cases                                            | 3587                                           | 371              | 269              |
| Person-years                                            | 2,610,059                                      | 222,169          | 140,215          |
| Incidence rate (per 100,000 person-years)               | 137 (133-142)                                  | 167 (151-185)    | 192 (170-216)    |
| Unadjusted                                              | 1                                              | 1.22 (1.09-1.35) | 1.40 (1.23-1.58) |
| Age-adjusted <sup>d</sup>                               | 1                                              | 1.07 (0.96-1.19) | 1.09 (0.96-1.24) |
| MV-adjusted <sup>e</sup>                                | 1                                              | 1.05 (0.94-1.17) | 1.04 (0.91-1.19) |
| MV-adjusted <sup>f</sup> (replace BMI with weight loss) | 1                                              | 1.08 (0.96-1.20) | 1.02 (0.89-1.17) |

Abbreviations: NHS, Nurses' Health Study; HPFS, Health Professionals Follow-up Study; MV, multivariate; BMI, body mass index; MET, metabolic equivalent task.

<sup>a</sup> Other cancers of the digestive system, including cancers of esophagus, stomach, small intestine, colorectum, anus, liver, and gallbladder.

<sup>b</sup> Follow-up time: antidiabetic medications (NHS: 1990-2012; information on antidiabetic medication use in HPFS was assessed relatively late (in 2008 and afterwards) and was therefore not included in the analyses), anticoagulant (NHS: 1996-2012; HPFS: 1998-2012), and antihypertensive medications (NHS: 1990-2012; HPFS: 1988-2012).

<sup>c</sup> Medication change was measured by comparing questionnaires returned at a median of 1 year (current status of use) and 3 years (previous status of use) before pancreatic cancer diagnosis.

<sup>d</sup> Stratified by age (in months), sex/cohort (women, men; in the pooled analyses only), and calendar year of the survey cycle (each 2-year interval).

<sup>e</sup> Stratified by age (in months), sex/cohort (women, men; in the pooled analyses only), and calendar year of the survey cycle (each 2-year interval); adjusted for race/ethnicity (white, black, other, unknown), BMI (continuous, kg/m<sup>2</sup>), physical activity (continuous, MET-hours/week), smoking (continuous, pack-years), alcohol intake (continuous, grams/day), history of diabetes (yes, no), multivitamin use (yes, no), and previous status of use (yes, no).

<sup>f</sup> Replace BMI (continuous, kg/m<sup>2</sup>) with recent weight loss (no, ≤5%, 5%< to ≤10%, and >10% weight loss).
